# Supplementary material for: CM1, a Chrysin Derivative, Protects from Endotoxin-Induced Lethal Shock by Regulating the Excessive Activation of Inflammatory Responses
Source: MDPI journal article supplement (doi:10.3390/nu16050641), 2024-02-25
Supplement: s1 [file s1]

## Supplementary Materials

# CM1, a Chrysin Derivative, Protects from Endotoxin-Induced Lethal Shock by Regulating the Excessive Activation of Inflammatory Responses

Jae-Hyung Lee <sup>1,2,3,†</sup>, Young-Bok Ko <sup>3,4,†</sup>, Yong-Min Choi <sup>1,2,3</sup>, Jinju Kim <sup>1,2,3</sup>, Hwan-Doo Cho <sup>1,2</sup>, Hyeonil Choi <sup>1,2</sup>, Ha-Yeon Song <sup>5</sup>, Jeong-Moo Han <sup>5</sup>, Guang-Ho Cha <sup>1,2,3</sup>, Young-Ha Lee <sup>1,2,3</sup>, Jin-Man Kim <sup>2,3,6</sup>, Woo-Sik Kim <sup>7,\*</sup>, Eui-Baek Byun <sup>5,\*</sup> and Jae-Min Yuk <sup>1,2,3,\*</sup>

<sup>1</sup> Department of Infection Biology, College of Medicine, Chungnam National University, Daejeon 35015, Republic of Korea; dlwogud1003@naver.com (J.-H.L.); ymcdragon@naver.com (Y.-M.C.); w112s3@naver.com (J.K.); johwandoo@naver.com (H.-D.C.); perfectviewman@naver.com (H.C.); gcha@cnu.ac.kr (G.-H.C.); yhaelee@cnu.ac.kr (Y.-H.L.)

<sup>2</sup> Infection Control Convergence Research Center, College of Medicine, Chungnam National University, Daejeon 35015, Republic of Korea; jinmank@cnu.ac.kr

<sup>3</sup> Department of Medical Science, College of Medicine, Chungnam National University, Daejeon 35015, Republic of Korea; koyoung27@gmail.com

<sup>4</sup> Department of Obstetrics & Gynecology, Chungnam National University Hospital, Daejeon 35015, Republic of Korea

<sup>5</sup> Korea Advanced Radiation Technology Institute, Korea Atomic Energy Research Institute, Jeongeup 56212, Jeonbuk, Republic of Korea; songhy@kaeri.re.kr (H.-Y.S.); jmhahn@kaeri.re.kr (J.-M.H.)

<sup>6</sup> Department of Pathology, College of Medicine, Chungnam National University, Daejeon 35015, Republic of Korea

<sup>7</sup> Functional Biomaterial Research Center, Korea Research Institute of Bioscience and Biotechnology, Jeongeup 56212, Jeonbuk, Republic of Korea

\* Correspondence: kws6144@kribb.re.kr (W.-S.K.); ebbyun80@kaeri.re.kr (E.-B.B.); yjaemin0@cnu.ac.kr (J.-M.Y.)

† These authors contributed equally to this work.

## Supplemental Materials and methods

### Routine Blood Examination and Serum Biochemistry

After administration of solvent control or CM1, blood samples from each group were obtained on day 3. Routine blood examination was conducted using a blood analyzer (IDEXX, Procyte Dx, USA). Serum biochemistry were measured by a blood biochemistry analyzer (IDEXX, CatalystOne, USA).

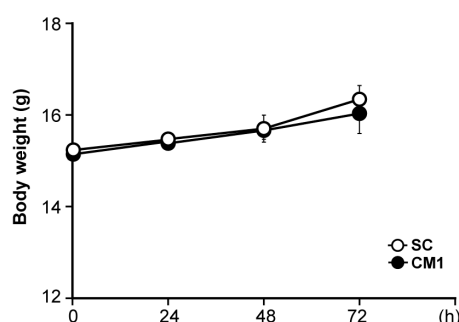

**Figure S1. Monitoring of body weight in mice received with solvent control or CM1.** Mice (n = 5 per group) were intravenously injected with either vehicle control or CM1 (10 mg/kg) once daily for 3 days and the body weight then was monitored for 3 days. SC, solvent control.

**Table S1. Monitoring of hematology and serum biochemical markers in mice received with solvent control or CM1.** Mice (n = 5 per group) were intravenously injected with either vehicle con-

trol or CM1 (10 mg/kg) once daily for 3 days and the blood of mice then was collected. Hematology markers and serum biochemical markers were analyzed using a routine blood examination and clinical biochemistry examination, respectively. SC, solvent control; RBC, red blood cell; HCT, hematocrit value; HB, hemoglobin level; MCV, mean corpuscular volume; MCH, mean corpuscular hemoglobin; MCHC, mean corpuscular hemoglobin concentration; WBC, white blood cell.

| Marker                          | SC               | CM1             | <i>p</i> -Value |
|---------------------------------|------------------|-----------------|-----------------|
| <b>Hematology marker</b>        |                  |                 |                 |
| RBC ( $\times 10^{12}/L$ )      | 8.24 $\pm$ 0.54  | 8.13 $\pm$ 0.53 | 0.78608         |
| HCT (%)                         | 40 $\pm$ 2.62    | 39.6 $\pm$ 2.24 | 0.848472        |
| HB (g/dL)                       | 12 $\pm$ 0.79    | 11.9 $\pm$ 0.72 | 0.856374        |
| MCV (fL)                        | 48.5 $\pm$ 0.57  | 48.7 $\pm$ 1.28 | 0.740693        |
| MCH (pg)                        | 14.5 $\pm$ 0.14  | 14.6 $\pm$ 0.19 | 0.523742        |
| MCHC (g/dL)                     | 29.9 $\pm$ 0.15  | 29.9 $\pm$ 0.44 | 0.933529        |
| WBC ( $\times 10^9/L$ )         | 0.76 $\pm$ 0.12  | 0.61 $\pm$ 0.13 | 0.31308         |
| Neutrophil (%)                  | 3.13 $\pm$ 0.97  | 7 $\pm$ 2.32    | 0.097733        |
| Lymphocyte (%)                  | 71.4 $\pm$ 7.28  | 78.5 $\pm$ 5.12 | 0.326314        |
| Monocyte (%)                    | 16 $\pm$ 3.36    | 18.9 $\pm$ 6.4  | 0.677637        |
| Basophil (%)                    | 3.77 $\pm$ 0.66  | 4.8 $\pm$ 0.6   | 0.262215        |
| <b>Serum biochemical marker</b> |                  |                 |                 |
| ALT (U/L)                       | 65.3 $\pm$ 4.5   | 64.7 $\pm$ 0.94 | 0.847438        |
| AST (U/L)                       | 249.3 $\pm$ 39.6 | 229 $\pm$ 35.2  | 0.616322        |
